## Trait Heritability in Major Transitions

M. D. Herron<sup>1,3</sup>, S. A. Zamani-Dahaj<sup>2</sup>, and W. C. Ratcliff<sup>1</sup>

<sup>1</sup> School of Biology, Georgia Institute of Technology. North Avenue, Atlanta, GA 30332

<sup>2</sup> School of Physics, Georgia Institute of Technology. North Avenue, Atlanta, GA 30332

<sup>3</sup> Correspondence: xprinceps@gmail.com, phone 520-820-6698, fax 406-243-4184

**Abstract:** A crucial component of major transitions theory is that after the transition, adaptation occurs primarily at the level of the new, higher-level unit. For collective-level adaptations to occur, though, collective-level traits must be heritable. Since collective-level trait values are functions of lower-level trait values, collective-level heritability is related to particle-level heritability. However, the nature of this relationship has rarely been explored in the context of major transitions. We examine relationships between particle-level heritability and collective-level heritability for several functions that express collective-level trait values in terms of particle-level trait values. When a collective-level trait value is a linear function of particle-level trait values and collective size is fixed, the heritability of a collective-level trait is never less than that of the corresponding particle-level trait and is higher under most conditions. For more complicated functions, collective-level heritability is higher under most conditions, but can be lower when the environment experienced by collectives is heterogeneous. Within-genotype variation in collective size reduces collective-level heritability, but it can still exceed particle-level heritability when phenotypic variance among particles within collectives is large. These results hold for a diverse sample of biologically relevant traits. Rather than being an impediment to major transitions, we show that collective-level

25 heritability superior to that of the lower-level units can often arise ‘for free’, simply as a  
26 byproduct of collective formation.

27

28 **Keywords:** Evolution; Heritability; Major Transitions; Multicellularity; Quantitative

29 genetics; Simulations

30

31

## 32 **Introduction**

33 Major transitions, or evolutionary transitions in individuality, are a framework for  
34 understanding the origins of life's hierarchy and of biological complexity [1,2]. During  
35 such a transition, a new unit of evolution emerges from interactions among previously  
36 existing units. This new unit, or collective, has traits not present before the transition and  
37 distinct from those of the units that comprise it (particles; see [3] for an in-depth  
38 discussion of collective-level traits). These collective-level traits are potentially subject to  
39 selection. Over the course of the transition, the primary level of selection shifts from the  
40 particle (lower-level unit) to the collective (higher-level unit), for example from cells to  
41 multicellular organisms or from individual insects to eusocial societies.

42 Evolution by natural selection requires heritable variation in phenotypes that  
43 affect fitness at the level at which selection occurs [4,5]. The breeder's equation of  
44 quantitative genetics shows that heritability and strength of selection contribute equally to  
45 the adaptive response (see Analytical model below). When a collective-level trait is  
46 exposed to selection, it is collective-level heritability (the heritability of the collective-  
47 level trait) that determines the magnitude of the response. Collective-level heritability of  
48 traits is thus necessary for collective-level adaptations, but the emergence of collective-  
49 level heritability during a major transition has often been assumed to be difficult. For  
50 example, Michod considers the emergence of collective-level heritability through conflict  
51 mediation a crucial step in major transitions [2,6,7]. Simpson says that "From the view of  
52 some standard theory, these transitions are impossible," in part because particle-level  
53 heritability greatly exceeds collective-level heritability [8].

54 Major transitions can be conceptualized as a shift from MLS1 to MLS2, in the  
55 sense of Damuth and Heisler [5], as in Okasha [9] (see also Godfrey-Smith [10], Shelton  
56 & Michod [11]). In MLS1, properties of the particles are under selection; in MLS2, it is  
57 the properties of the collectives. We follow Okasha [9] in referring to the lower-level  
58 units in a transition as ‘particles’ and the higher-level units as ‘collectives.’ Although our  
59 biological analogies are presented in terms of cells as particles and multicellular  
60 organisms as collectives, in principle our model could be extended to any pair of adjacent  
61 levels.

62 According to Michod [6], “...the challenge of ETI [evolutionary transitions in  
63 individuality] theory is to explain how fitness at the group level in the sense of MLS2  
64 emerges out of fitness at the group level in the sense of MLS1.” But fitness, or selection,  
65 is only half of the breeder’s equation. Predicting the response to selection requires an  
66 estimate of heritability.

67 Whether or not collective-level fitness in MLS2 is a function of particle-level  
68 fitness is a matter of some disagreement (for example, Rainey and Kerr say no [11]).  
69 However, collective-level phenotypes must be functions of particle-level trait  
70 phenotypes, unless we accept strong emergence, a philosophical position tantamount to  
71 mysticism [13]. The function may be complex and involve cell-cell communication,  
72 feedbacks, environmental influences, etc., but it is still a function that is, in principle,  
73 predictable from particle-level trait values.

74 Nevertheless, the relationship between the heritability of particle-level traits and  
75 that of collective-level traits has rarely been considered in the context of major  
76 transitions, leading Okasha [14] to wonder, “Does variance at the particle level

77 necessarily give rise to variance at the collective level? Does the heritability of a  
78 collective character depend somehow on the heritability of particle characters? The  
79 literature on multi-level selection has rarely tackled these questions explicitly, but they  
80 are crucial." Similarly, Goodnight [15] says, "...we really do not have a good  
81 understanding of what contributes to group heritability, how to measure it, or even how to  
82 define it."

83 While the role of selection has often been considered in the context of major  
84 transitions, the role of trait heritability has been relatively neglected. We examine  
85 relationships between particle-level heritability and collective-level heritability for  
86 several functions that express collective-level trait values in terms of particle-level trait  
87 values. For the simplest (linear) function, we derive an analytical solution for the  
88 relationship. For more complex functions, we employ a simulation model to explore the  
89 relationship over a range of conditions.

90

### 91 **Analytical model**

92 There are several ways to estimate heritability, the proportion of phenotypic variation  
93 explained by genetic variation. If the strength of selection is known, heritability can be  
94 estimated by back-calculating from the breeder's equation:  $R = h^2 S$ , where  $R$  is the  
95 response to selection,  $S$  the selection differential, and  $h^2$  the narrow-sense heritability (i.e.  
96 the proportion of phenotypic variation explained by additive genetic variation). This can  
97 be rearranged as  $h^2 = S/R$ . Another method is to compare parent and offspring trait  
98 values: the slope of the parent-offspring regression is an estimator of heritability [16]. We  
99 use the latter method in the simulations described in the next section.

100           Since heritability can be defined as the proportion of phenotypic variance  
101 explained by genetic variance, one method of estimation is to partition total variance into  
102 its components using an analysis of variance. We employ this approach in an analytical  
103 model to derive the relationship between the heritability of a collective-level trait and that  
104 of the particle-level trait from which it arises. For the sake of tractability, we begin with  
105 the simplest case, assuming that the size (number of particles) of collectives is fixed and  
106 that the collective-level trait value is a linear function of the particle-level trait values.  
107 We further assume that reproduction is asexual, so the proper measure of heritability is  
108 broad-sense heritability,  $H^2$  [17]. Broad-sense heritability describes the proportion of  
109 phenotypic variation explained by all genetic variation, including both additive and non-  
110 additive components.

111           We imagine a population in which collectives are made up of particles and  
112 genetically distinct clones are made up of collectives. As a concrete example, we can  
113 think of a population of undifferentiated volvocine algae, such as *Gonium*, in which case  
114 the particles are cells and the collectives are colonies. Because of asexual reproduction,  
115 many genetically-identical collectives may comprise a clone. Genetic variation among  
116 clones may arise through mutation or because the population is facultatively sexual, in  
117 which case these results will only hold for evolution within the asexual phase (in the  
118 *Gonium* example, during the summer bloom that precedes autumn mating and winter  
119 dormancy).

120           Broad-sense heritability is the ratio of genetic variance ( $V_G$ ) to total phenotypic  
121 variance ( $V_P$ ), estimated as the ratio of among-clone variance to total phenotypic variance  
122 [17]. Inherent in this concept is that genetically identical individuals are not always

123 phenotypically identical;  $V_P$  includes both genetic and non-genetic variation. Non-genetic  
124 variation can arise from maternal effects, environmental (including microenvironmental)  
125 effects, and random developmental noise. Phenotypic variation among genetically  
126 identical individuals has been extensively documented, including in bacteria [18,19],  
127 unicellular eukaryotes [20], plants [21], animals [17], and volvocine algae [22].

128 In this section, we use an ANOVA framework to estimate heritability as a ratio of  
129 sums of squares. Strictly speaking, heritability is a ratio of variances, not of sums of  
130 squares. However, the ratios of the relevant sums of squares converges to that of the  
131 variances as the number of categories increases (see Supplemental Information), and for  
132 all but tiny or genetically uniform biological populations, the difference between the two  
133 ratios is negligible.

134 Treating particles and collectives separately, the phenotype of particle  $k$  in  
135 collective  $j$  within clone  $i$  can be expressed as

$$136 \mathbf{y}_{ijk} = \mathbf{m} + \mathbf{A}_i + \mathbf{B}_{j(i)} + \mathbf{C}_{k(ij)} \quad (1)$$

137 where  $m$  is the mean genotypic value of all clones,  $A_i$  is the deviation of clone  $i$  from  $m$ ,  
138  $B_{j(i)}$  is the deviation of collective  $j$  from the mean of clone  $i$ , and  $C_{k(ij)}$  is the deviation of  
139 particle  $k$  from the mean of collective  $j$  within clone  $i$ . The model in (1) describes a nested  
140 ANOVA framework, in which the sums of squared deviations from the population mean  
141 is partitioned into among-clone, among collectives within clone, and within-collective  
142 components. The among-clone component, the sum of squared deviations of  $A$  from  $m$ , is

143 
$$\text{SSA} = bc \sum_{i=1}^a (\bar{y}_{i..} - \bar{y}_{...})^2 \quad (2)$$

144 where  $a$ ,  $b$ , and  $c$  are the number of clones, collectives within a clone, and particles  
 145 within a collective, respectively. The sum of squared deviations of collectives within  
 146 clones is

147 
$$\text{SS(B/A)} = c \sum_{i=1}^a \sum_{j=1}^b (\bar{y}_{ij.} - \bar{y}_{i..})^2, \quad (3)$$

148 that among particles within collectives is

149 
$$\text{SS(C/B)} = \sum_{i=1}^a \sum_{j=1}^b \sum_{k=1}^c (y_{ijk} - \bar{y}_{ij.})^2, \quad (4)$$

150 and total sum of squares is

151 
$$\text{SST}_y = \text{SSA} + \text{SS(B/A)} + \text{SS(C/B)}. \quad (5)$$

152 Broad-sense heritability of a particle-level trait,  $H_y^2$ , is the ratio of genetic variance to  
 153 total phenotypic variance:

154 
$$H_y^2 = \frac{V_{Gy}}{V_{Py}} \approx \frac{\text{SSA}}{\text{SSA} + \text{SS(B/A)} + \text{SS(C/B)}}. \quad (6)$$

155 We now turn our attention to collective-level traits. The phenotype of collective  $j$   
 156 within clone  $i$  can be expressed as

157 
$$z_{ij} = \mu + \alpha_i + \beta_{j(i)}, \quad (7)$$

158 where  $\mu$  is the mean genetic value of all clones,  $\alpha_i$  is the deviation of clone  $i$  from  $\mu$ , and  
 159  $\beta_{j(i)}$  is the deviation of collective  $j$  from the mean of clone  $i$ . The sum of squared  
 160 deviations of  $\alpha$  from  $\mu$  is

161 
$$\text{SS}\alpha = b \sum_{i=1}^a (\bar{z}_i - \bar{z}_{..})^2. \quad (8)$$

162 The sum of squares among colonies within clones is

163 
$$\text{SS}(\beta/\alpha) = \sum_{i=1}^a \sum_{j=1}^b (z_{ij} - \bar{z}_i)^2, \quad (9)$$

164 and the total sum of squares is



165  $SST_z = SS\alpha + SS(\beta/\alpha).$  (10)

166 Broad-sense heritability of a collective-level trait,  $H_z^2$ , is the ratio of genetic variance to  
167 total phenotypic variance,

168  $H_z^2 = \frac{V_{Gz}}{V_{Pz}} \approx \frac{SS\alpha}{SS\alpha + SS(\beta/\alpha)}.$  (11)

169 If collective-level trait value is the average of cell-level trait values,  $z_{ij} = y_{ij}$ ,

170  $\bar{z}_{i.} = \bar{y}_{i.}$ , and  $\bar{z}_{..} = \bar{y}_{..}$ . Thus  $SS\alpha = cSSA$ , and  $SS(\beta/\alpha) = cSS(B/A)$ . Substituting into

171 (11),

172 we get

173  $H_z^2 \approx \frac{SSA}{(SSA + SS(B/A))}.$  (12)

174 The ratio of collective-level heritability to particle-level heritability is thus

175  $\frac{H_z^2}{H_y^2} \approx \frac{SSA + SS(B/A) + SS(C/B)}{SSA + SS(B/A)}.$  (13)

176 Collective-level heritability is therefore never less than particle-level heritability (i.e., the  
177 ratio of heritabilities is never less than 1), and is greater unless  $SS(C/B) = 0$ , in other  
178 words unless particles within each collective have identical phenotype.

179 Although we have derived this relationship assuming that the collective-level trait

180 value is the average of particle-level trait values, the result holds for any linear function.

181 The substitution that gets us from (11) to (12) introduces the constant  $c$ , which scales

182 both numerator and denominator and therefore cancels out. Different linear functions

183 would change the magnitude of the constant relating  $SS\alpha$  to  $cSSA$  and  $SS(\beta/\alpha)$  to

184  $cSS(B/A)$  but not the fact that numerator and denominator are scaled by the same

185 constant.

186           The approximations in (6) and (11), which express ratios of variances as ratios of  
187 sums of squares, hold when the number of clones ( $a$ ) and the number of genetically  
188 identical collectives within a clone ( $b$ ) are large (Electronic Supplement 1). For example,  
189 at  $a = b = 10$ , the approximation differs from the true value by less than 1%. Thus the  
190 results of the analytical model hold for all but tiny and/or extremely genetically  
191 depauperate populations. The number of particles within a collective ( $c$ ) does not play a  
192 role, so our results are relevant even early in a major transition, when the collectives are  
193 likely to be small. For most real biological populations, the difference between the true  
194 heritability and the sums of squares approximation will be negligible (see Electronic  
195 Supplement 1 for a simple numerical example).

196

### 197 **Simulation model**

198           The correspondence between particle-level and collective-level trait values is likely to be  
199 more complicated than a linear relationship for many interesting and biologically relevant  
200 cases. Here we explore more complicated trait mapping functions using a simulation  
201 model. As above, particles grow in clonal collectives, which reproduce by forming two  
202 new collectives, each with as many particles as its parent. The initial population is  
203 founded by ten genetically distinct clones, each of which has a different genetically  
204 determined mean particle phenotype (spaced evenly between 1 and 2). These are grown  
205 for at least 7 generations, resulting in at least 127 collective-level reproductive events per  
206 genotype and  $127n$  (where  $n$  is particle number per collective) particle-level reproductive  
207 events per genotype. Simulation models are provided as Electronic Supplements 2-8.

208 In this model, we consider two sources of non-genetic effects on particle  
209 phenotype (Figure 1), each of which should lower the heritability of both particle- and  
210 collective-level traits. The first is intrinsic reproductive stochasticity in particle  
211 phenotype, analogous to developmental instability [23]. In the model, we determine the  
212 phenotype of daughter cells by sampling from a distribution centered on the parent's  
213 genetic mean, with standard deviation  $\sigma$ . As shown in the analytical model above, by  
214 averaging out this variation, collectives can gain a heritability advantage over cells.

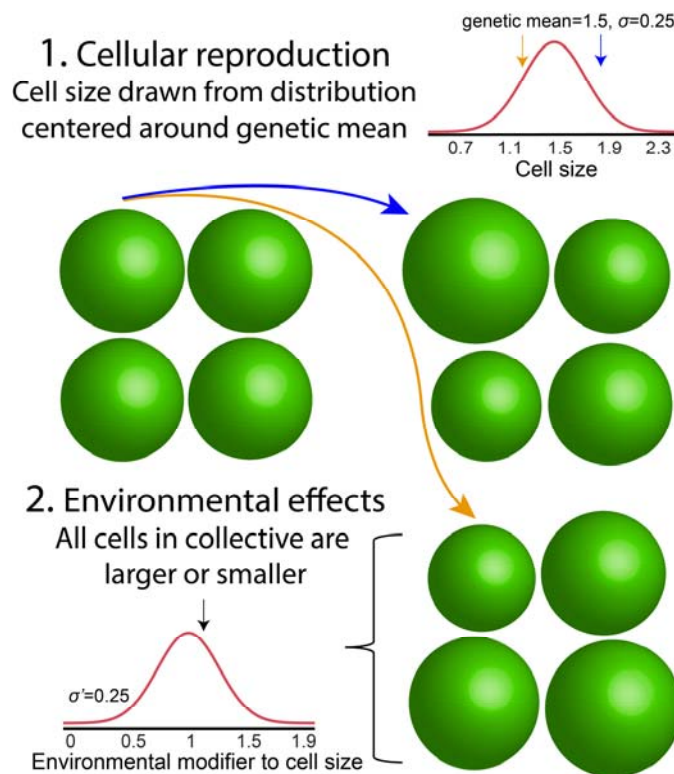

215

216

217 **Figure 1. Two non-genetic modifiers to cell phenotype.** There are two non-genetic  
218 influences on particle phenotype (cell size in this example) in our model: developmental  
219 instability, a stochastic effect that varies a particle's phenotype from its genetic mean  
220 (with standard deviation  $\sigma$ ), and environmental effects, which modify the phenotype of all  
221 particles in a collective by the same amount (with standard deviation  $\sigma$  ).  
222

223

224 Our simulation also considers the phenotypic effects of environmental  
heterogeneity. Here, we model collectives as independently experiencing different

225 environmental conditions that affect the phenotypes of all cells within them in the same  
226 manner. To extend the biological analogy offered above, *Gonium* colonies growing near  
227 the surface of a pond (where light and CO<sub>2</sub> are abundant) may form colonies with larger  
228 cells than clonemates near the bottom. We implemented this in our model by assigning a  
229 size modifier, drawn from a normal distribution centered on 1 with standard deviation  
230  $\sigma$ , to each collective. We then multiplied the phenotype of each particle within the  
231 collective by this modifier. This source of phenotypic heterogeneity should reduce the  
232 heritability of collectives more than particles, simply because collectives experience a  
233 relatively higher frequency of stochastic events than particles do (each collective gets  
234 assigned a different size multiplier, but every particle within that collective experiences  
235 the same size multiplier).

236 We examine the effect of each of the above sources of phenotypic variation  
237 independently for the example of cells (particles) within nascent multicellular organisms  
238 (collectives). For a linear relationship, collective size is simply the sum of the sizes of  
239 cells within the collective. For both cells and collectives, heritability is assessed by  
240 calculating the slope of a linear regression on parent and offspring phenotype [16]. In this  
241 simple case, mean collective-level heritability is always greater than or equal to cell-level  
242 heritability. Only when  $\sigma = 0$  (*i.e.*, when all cells within a collective have identical  
243 phenotype) are cell- and collective-level heritability equal, in agreement with the  
244 analytical model. Greater developmental instability for cell size increases the advantage  
245 of collective-level heritability over cell-level heritability (Figure 2a). Larger collectives,  
246 which average out cellular stochasticity more effectively, experience a greater increase in  
247 heritability than smaller collectives (Figure 2a). Note that the simulations run in Figure 2a

248 reflect a very patchy environment in which environmental effects on cell size within  
249 collectives are large ( $\sigma_{\square} = 0.25$ ). While our model is not explicitly spatial, when  $\sigma_{\square}$  is  
250 high, different collectives experience different environmental effects on their mean cell  
251 size, simulating the effects of a patchy environment. Increasing the magnitude of these  
252 environmental effects on cell size diminishes the difference in heritability between  
253 collectives and cells, but mean collective-level heritability is still greater than cell-level  
254 heritability for all parameter combinations (Figure 2b).

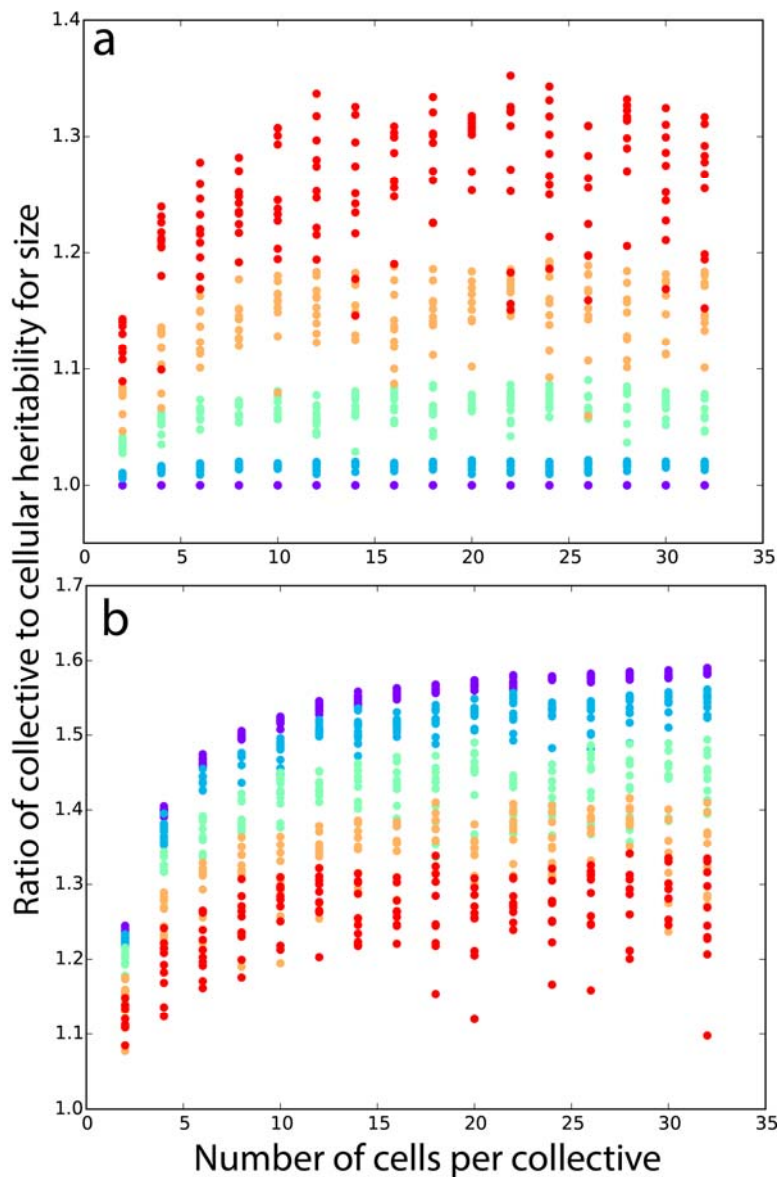

255

256 **Figure 2. Collective-level heritability of size is greater than particle-level heritability**  
257 **for size.** In **a)**, we hold the effect of the environment fixed (standard deviation  
258  $\sigma_{\square} = 0.25$ ), and vary the degree of developmental instability for particle size  $\sigma$ :  $10^{-4}$   
259 (purple), 0.0625 (blue), 0.125 (green), 0.1875 (yellow), 0.25 (red). In the absence of  
260 developmental instability for size, collective and cell-level heritabilities are identical.  
261 Greater developmental instability increases relative collective-level heritability. **b)** Here  
262 we hold developmental instability fixed at  $\sigma = 0.25$ , and vary between-collective  
263 environmental effects on cell size from  $\sigma_{\square} = 10^{-4}$  (purple) to 0.25 (red). When  
264 developmental instability is nonzero, larger collectives improve collective-level  
265 heritability. We ran ten replicates of each parameter combination and simulated  
266 populations for nine generations of growth.

267  
268         The volume of the cellular collective (Figure 2, Figure 3a), which is simply the  
269 sum of the cell volumes within it, represents the simplest function mapping cellular to  
270 multicellular trait values. We now consider more complicated nonlinear functions  
271 relating cellular to multicellular trait values, some of which have biological relevance to  
272 the evolution of multicellularity. For each function, we calculated the relative heritability  
273 of collective- to cell-level traits for 32-celled collectives across 1024 combinations of  $\sigma$   
274 and  $\sigma_{\square}$  ranging from 0 to 0.25.

275         The first nonlinear collective-level trait we consider is its diameter. Large size is  
276 thought to provide a key benefit to nascent multicellular collectives when they become  
277 too big to be consumed by gape-limited predators [24,25]. For a collective that is  
278 approximately spherical, the trait that actually determines the likelihood of being eaten is  
279 diameter, which is therefore an important component of fitness. For geometric simplicity  
280 we assume that the cells within the collective are pressed tightly together into a sphere,  
281 allowing us to calculate collective radius as  $d = 2 \left( \frac{3V}{4\pi} \right)^{\frac{1}{3}}$ , where  $V$  is the sum of the cell  
282 volumes within the collective. Collective volume (Figure 3a) and diameter (Figure 3b)  
283 exhibit similar dynamics, with collective-level heritability always exceeding cell-level

284 heritability, and being maximized under conditions of strong cell size stochasticity (high  
285  $\sigma$ ) and no environmental heterogeneity (low  $\sigma_e$ ).

286

287

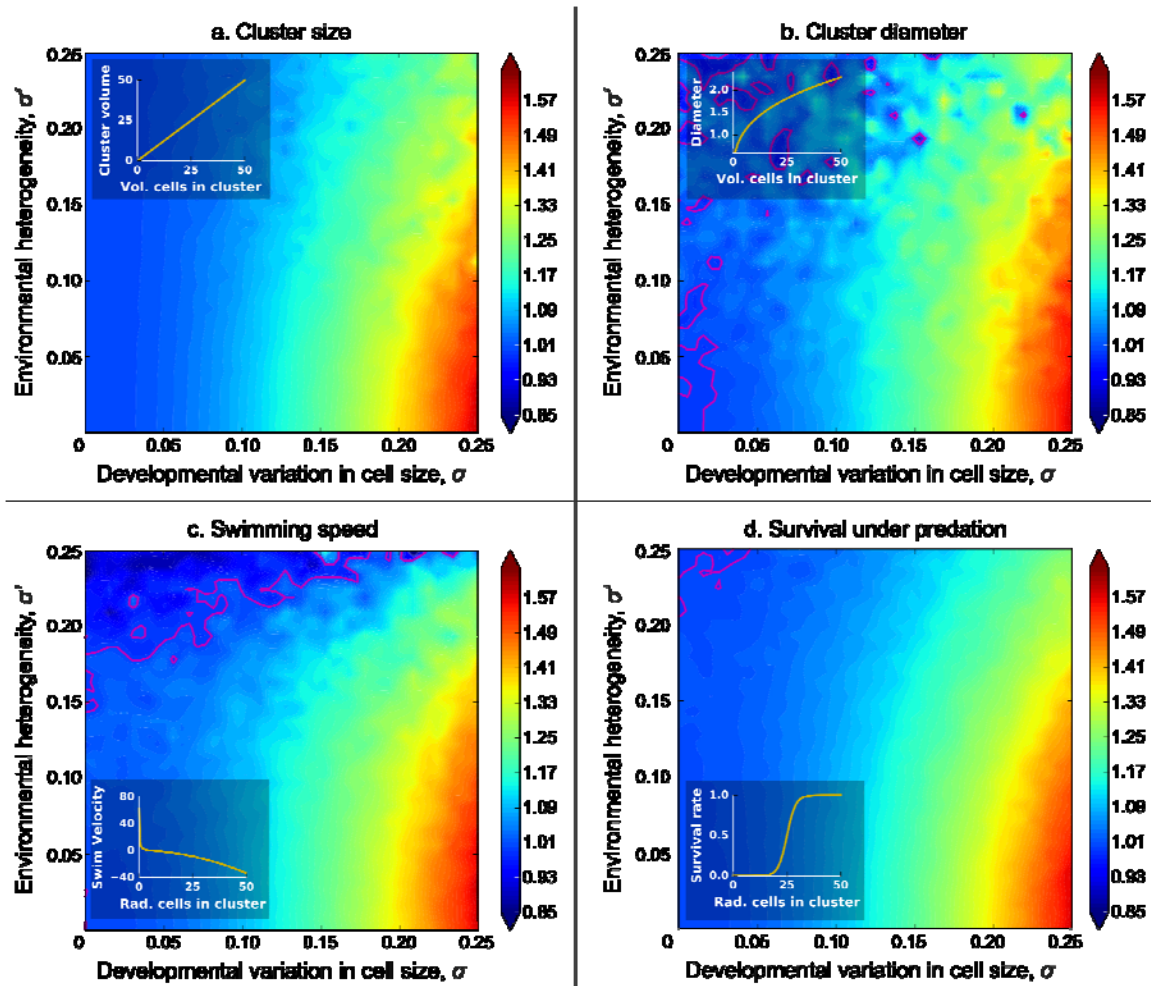

288

289 **Figure 3. Relative heritability of various collective-level traits to cell-level**

290 **heritability for size.** Here we examine the heritability of four multicellular traits that

291 depend on the size of their constituent cells, relative to cellular heritability for size. The

292 relationship between the size of the cells within collectives and the multicellular trait are

293 shown as insets. We consider three biologically-significant traits with different functions

294 mapping the size of cells within the collective onto collective phenotype. The heritability

295 of collective size (a) and diameter (b) is always higher than cell-level heritability for size,

296 and is maximized when cellular developmental noise is greatest and among-collective

297 environmental effects are smallest (lower right corner). We modeled swimming speed (c)

298 based on the model of Solari *et al.* (2006) for volvocine green algae. We also considered

299 survival rate under predation as a logistic function of radius (d). Like a and b, collective-

300 level heritability is highest relative to cell-level heritability when environmental

301 heterogeneity is minimal. Pink contours denote relative heritability of 1. In these

302 simulations we consider 32 cell collectives grown for 7 generations. The colormap  
303 denotes collective-level heritability divided by cell-level heritability for size across 1024  
304  $\sigma$ ,  $\sigma^2$  combinations.

305

306 Next, we consider swimming speed as a function of cell radius. We based this  
307 simulation on the hydrodynamics model of volvocine green algae derived by Solari *et al.*  
308 [26]. For simplicity, we modeled 32-celled, undifferentiated collectives (GS colonies in  
309 [26]), which would be similar to extant algae in the genus *Eudorina*. Given these  
310 assumptions, the function relating cell radius to upward swimming speed (Equation 4  
311 from [26]) can be simplified to

$$312 \quad V_{up} = \left(\frac{fN^{0.5}}{3\pi\eta_w}\right)r^{-1} - \left(\frac{g\Delta\rho_c(4/3)N^2}{3\eta_w}\right)r^2 \quad (14)$$

313 where  $f$  is average effective upward swimming force per cell,  $N$  is the number of cells per  
314 collective,  $\eta_w$  is water viscosity,  $r$  is the average radius of cells in the collective, and  $\Delta\rho_c$   
315 is the density difference between cells and water. Electronic Supplement 9 provides a  
316 more detailed description of the derivation of Equation 14.

317 Using the numerical values in Solari *et al* [26],  $\eta_w = 0.01 \text{ g/cm}\cdot\text{s}$ ,  $\Delta\rho_c =$   
318  $0.047\text{g/cm}^3$ , and  $f = 2.4 \times 10^{-7} \text{ g}\cdot\text{cm/s}^2$ , so

$$319 \quad V_{up} = \frac{0.02}{\pi}r^{-1} - \frac{400}{3}r^2 \quad (15)$$

320 In this model, the swimming force of cells is independent of cell size, so, as cells get  
321 larger the collective will become heavier (more negatively buoyant) without a  
322 corresponding increase in total swimming force, and therefore its upward swimming  
323 speed will decrease. Thus upward swimming speed is a monotonically declining function  
324 of cell radius (Fig. 3c inset), unlike the functions for volume and diameter (Fig. 3a, 3b  
325 insets), both of which are monotonically increasing. Nevertheless, the general behavior of



326 heritability is very similar to the previous ones and for a wide range of parameter values,  
327 the collective-level trait has a higher heritability than the cell-level trait (Fig. 3c).

328         Next, we consider a function describing a collective's survival rate in the presence  
329 of a predator that can only consume collectives below a certain size. We calculated the  
330 survival rate ( $c$ ) as a logistic function of the collective's radius, effectively assuming that  
331 predation efficiency drops off quickly when collectives reach a threshold size (Fig. 3d  
332 inset):

$$333 \quad c = \frac{1}{1 + e^{-0.5(0.5rN^{0.5} - 25)}} \quad (16)$$

334         As with the previous functions (Fig. 3a-c), collective-level heritability is greater  
335 than cell-level heritability for much of the trait space and is maximized under conditions  
336 of high cellular stochasticity ( $\sigma$ ) and low environmental heterogeneity ( $\sigma^2$ ; Fig. 3d).

337         Finally, we consider the case in which the simplifying assumption of constant cell  
338 number does not hold. Instead, the number of cells per collective fluctuates around the  
339 genetic mean  $\bar{N}$ . In this case, each collective reproduces two new collectives, but the  
340 number of cells per new collective is a random variable drawn from a normal distribution  
341 with mean  $\bar{N}$  and coefficient of variation  $CV_N$  (the coefficient of variation for a normal  
342 distribution is the ratio of standard deviation to the mean). We chose to represent  
343 variation in the number of cells per collective as  $CV_N$  instead of standard deviation so that  
344 the range of variation would not change with the size of the collective.

345         Variation in cell number, unlike the developmental and the environmental  
346 variation, does not affect the heritability of cells, only that of collectives. Therefore, we  
347 expected that increasing  $CV_N$  would decrease the ratio of collective-level to cell-level  
348 heritability. To test this effect, we calculated the relative heritability of size (volume) for

349 collectives and cells across 1024 combinations of  $\sigma$  and  $CV_N$  ranging from 0 to 0.25  
350 ( ). The simulation shows that the  $CV_N$  has a strong effect on collective-level  
351 heritability (Fig. 4). As  $CV_N$  increases, the ratio of collective- to cell-level heritabilities  
352 decreases, falling below one when the magnitude of  $\sigma$  is similar to or smaller than that of  
353  $CV_N$  (Figure 4).  
354

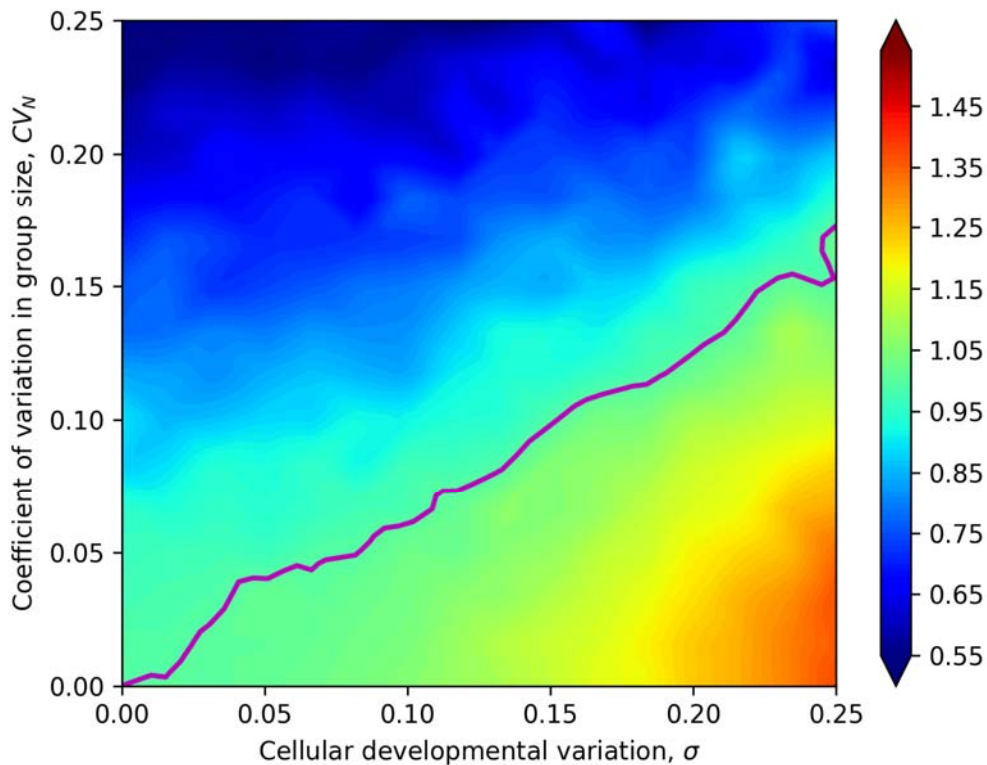

355  
356 **Figure 4. Relative heritability of collective size to cell size when the number of cells**  
357 **per collective varies.** When the coefficient of variation for cell number per collective  
358 ( $CV_N$ ) is low, collective-level heritability is always higher than cell-level heritability, but  
359 this advantage is undercut by increased variation in cell number. The ratio of collective-  
360 to cell-level heritability is maximized when developmental variation in cell size ( $\sigma$ ) is  
361 large and variation in the number of cells per collective is low. The pink contour denotes  
362 a ratio of collective-level to cell-level heritability of 1. In these simulations, we consider  
363 collectives with a genetic mean of 32 cells grown for 7 generations. The colormap  
364 denotes collective-level heritability divided by cell-level heritability for size across 1024  
365  $\sigma$ ,  $CV_N$  combinations.  
366

367 **Discussion**

368 Using a quantitative genetics framework, we have derived an analytical solution for the  
369 relationship between particle-level and collective-level heritability for a limited case.  
370 When particle number is constant and the collective-level trait value is a linear function  
371 of the particle-level trait values, the organismal heritability turns out to be a simple  
372 function of the cell-level heritability. In contrast to claims that particle-level heritability is  
373 always higher than collective-level heritability (e.g. [8]), we have shown that collective-  
374 level heritability is higher over a wide range of conditions. Because this result depends on  
375 the number of clones and the number of colonies within a clone, it may not hold for very  
376 small populations or those with little genetic variation. This is not a major limitation,  
377 though, since tiny, genetically homogeneous populations are unlikely to be the ones  
378 experiencing selectively driven evolutionary transitions in individuality.

379 This analytical result is a step toward understanding the relationship between  
380 heritabilities at two adjacent hierarchical levels, but the assumptions of constant particle  
381 number and linear function are restrictive. The simulation model shows that the results  
382 are somewhat dependent on the function relating the trait values at the two levels.  
383 However, these functions were chosen to be diverse, and the behavior of the relative  
384 heritabilities is nevertheless qualitatively similar, increasing with cellular developmental  
385 variation ( $\sigma$ ), decreasing with environmental heterogeneity ( $\sigma^2$ ), and exceeding 1 for  
386 most of the parameter space.

387 Of course, we have not (and cannot) comprehensively explored the universe of  
388 possible functions relating collective-level traits to particle-level traits. What we have  
389 done is explore a small sample of this space, with functions ranging from extremely

390 simple (volume) to somewhat more complex (swimming speed, survival under  
391 predation). We do not claim that the high heritabilities estimated for these collective-level  
392 traits would apply to all such traits, and a full accounting of possible functions is beyond  
393 the scope of this (or any) study. Rather, we have shown that for at least some such  
394 functions, the resulting collective-level traits can have high heritability, and thus be  
395 altered by selection, early in an evolutionary transition in individuality.

396 All four of the collective-level traits in the simulation models are potentially  
397 biologically relevant. Volume and diameter are both aspects of size, which can be an  
398 important component of fitness both in evolutionary transitions in individuality [27] and  
399 in life history evolution [28]. Swimming speed is a measure of motility, which has  
400 selective consequences for a wide range of organisms, including many animals and  
401 microbes. For planktonic organisms, a positive upward swimming speed provides active  
402 control of depth, allowing some control over light intensity (for autotrophs) and prey  
403 abundance (for heterotrophs). Survival under predation obviously has important fitness  
404 implications for many organisms, and both theoretical and experimental evidence  
405 implicate predation as a possible selective pressure driving the evolution of  
406 multicellularity. Kirk, for example, suggests that a “predation threshold” above which  
407 algae are safe from many filter feeders may have driven the evolution of multicellularity  
408 in the volvocine algae [29]. Microbial evolution experiments in the algae *Chlorella* and  
409 *Chlamydomonas* have shown that predation can drive the evolution of undifferentiated  
410 multicellular clusters [30–32].

411 In our simulations, we examined the effects of three independent sources of  
412 phenotypic variation affecting the relative heritability of particle and collective-level

413 traits. Stochastic variation in cell size around the clone's genetic mean ( $\sigma$ ) reduces the  
414 absolute heritability of cells and collectives by introducing non-heritable phenotypic  
415 variation. By averaging across multiple cells, however, collectives reduce the effects of  
416 this phenotypic variation, providing them with a relative heritability advantage over cells.

417 We also considered the effect of environmental heterogeneity in which all of the  
418 cells within a collective are affected in the same manner ( $\sigma'$ ). Collectives are  
419 disproportionately affected: each collective is assessed a different size modifier, but all of  
420 the cells within these collectives are affected in the same manner. As a result, collectives  
421 experience  $n$ -fold more stochastic events (where  $n$  is the number of cells per collective),  
422 which reduces their heritability relative to cells. The influence of these sources of  
423 variation is evident in the contour plots of Figure 3: the relative heritability of collectives  
424 to cells is maximized when cellular stochastic variation is high and environmental  
425 heterogeneity low (lower right corner of the plots). The effect of environmental  
426 heterogeneity in our simulations is consistent with the empirical finding of Goodnight  
427 [33] that group selection of *Arabidopsis* was more effective when among-deme  
428 environmental variance was low.

429 Finally, we considered variation in the number of particles per collective. Such  
430 variation substantially reduces the heritability of a collective-level trait. Even with  
431 reasonably large variation in collective size, though, the collective-level trait retains most  
432 of the heritability of the particle-level trait on which it is based (for example, ~55% at a  
433  $CV_N$  in particle number of 0.25).

434 Our results differ from previous considerations of heritability in important  
435 respects. For example, Queller [34] presents a useful reformulation of the Price equation  
436 for selection at two levels:

$$437 \quad \Delta \bar{G} = S_b h_b^2 + S_w h_w^2,$$

438 in which  $\Delta \bar{G}$  is the change in average trait value,  $S_b$  and  $S_w$  are the selection differentials  
439 between collectives and within collectives, respectively, and  $h_b^2$  and  $h_w^2$  are the  
440 heritabilities of the collective-level and individual-level traits, respectively. This  
441 formulation partitions the response to selection on a particle-level trait into within- and  
442 among-collective change, but the focus is still on particle-level traits. Our focus is on the  
443 evolution of collective-level traits. In the terminology of Damuth and Heisler [5], our  
444 focus is on MLS2, while Queller's is on MLS1. In addition, Queller makes no attempt to  
445 derive the relationship between collective-level heritability and particle-level heritability.

446 Michod and Roze [2] have previously modeled the relationship between particle-  
447 level and collective-level heritability of fitness during a major transition. However, as  
448 Okasha [14] points out, heritability of fitness only ensures that mean population fitness  
449 will increase over time. For selection to result in directional phenotypic change, it is  
450 phenotypes that must be heritable. Furthermore, Michod and Roze focused on within-  
451 organism genetic change. Our models assume that such change is negligible, as is likely  
452 to be true early in a transition, when collectives (*e.g.*, nascent multicellular organisms)  
453 presumably include a small number of clonally-replicating particles (*e.g.*, cells).

454 Okasha [35] considers heritability in MLS1 (which he refers to as group selection  
455 2) and MLS2 (his group selection 1) but does not attempt to derive a relationship between  
456 heritabilities at two levels. We have focused on just this relationship, because knowing

457 the ratio of heritabilities is necessary to predict the outcome of opposing selection at two  
458 levels. This has important implications for collective-level traits that arise from  
459 cooperation among particles. The presumed higher heritability of the particle-level traits  
460 has been seen as a problem for the evolution of cooperation that benefits the collective  
461 [2,8,36–38]. Our results show that this problem does not always exist.

462         Several previous papers have shown that group-level heritability (collective-level  
463 heritability in our terminology) exists and can be substantial. Slatkin [39], for example,  
464 showed that one measure of group-level heritability, fraction of total variance between  
465 lines, is substantial both in an additive model and in the *Tribolium* experiments of Wade  
466 and McCauley [40]. Under some conditions, the between-line variance of a linear trait  
467 such as the one we consider in our analytical model exceeds the within-line variance.

468         Bijma, Wade and colleagues [41–43] showed that variance in the total breeding  
469 value of a population can be increased, even to the point of exceeding phenotypic  
470 variance, by interactions among individuals. Our model does not consider (or require)  
471 interactions among individuals. Further, their model and empirical example are  
472 exclusively concerned with individual-level traits (particle-level traits in our  
473 terminology), for example survival days in chickens. They do not estimate group  
474 heritability as such, and judge that "it is unclear how this parameter should be defined or  
475 estimated."

476         Goodnight [15] considers the ratio of group-level heritability to individual-level  
477 heritability (in the narrow sense) using contextual analysis. Although this paper does not  
478 provide a formula to calculate this ratio, its inequality sets a minimum bound (with the  
479 assumption that selection at the two levels is in opposition). As in our analyses,

480 Goodnight shows that group-level heritability can exceed individual-level heritability in  
481 some circumstances.

482         Several simplifying assumptions underlie our models, most importantly the  
483 genetic identity of particles within collectives. This condition only applies to a subset of  
484 the major transitions. Queller recognized two subcategories within Maynard Smith and  
485 Szathmáry's [1] list of transitions, which he called "egalitarian" and "fraternal" transitions  
486 [44]. Briefly, egalitarian transitions involve particles that may be genetically distinct, or  
487 even from different species, such as the alliance of a bacterium with an Archaeon that  
488 gave rise to the eukaryotic cell. Fraternal transitions are those in which the particles are  
489 genetically similar or identical, such as the origins of eusociality and of most  
490 multicellular lineages.

491         Because of our assumption of genetic identity among particles, we cannot  
492 generalize our results to all types of major transitions. Egalitarian transitions will not  
493 normally meet this criterion. A possible exception is aggregative multicellularity, as seen  
494 in cellular slime molds and myxobacteria, when assortment is so high that fruiting bodies  
495 are genetically uniform. This is probably uncommon [45], but it does happen [46,47].  
496 Transitions in which reproduction of particles is obligately sexual, such as the origins of  
497 eusociality, also violate this assumption.

498         A better fit for our models is clonal multicellularity, which is probably the most  
499 common type of major transition. An incomplete list of independent origins of clonal  
500 multicellularity includes animals; streptophytes; chytrid, ascomycete, and basidiomycete  
501 fungi; florideophyte and bangiophyte red algae; brown algae; peritrich ciliates; ulvophyte  
502 green algae; several clades of chlorophyte green algae; and filamentous cyanobacteria



503 [48–51]. In most cases the early stages in these transitions probably violated the  
504 assumption of uniform particle number per collective, but our simulations show that our  
505 main results are robust to reasonable violations of this assumption.

506 One example that does approximate all of our assumptions is that of the volvocine  
507 green algae, an important model system for understanding the evolution of  
508 multicellularity. Volvocine algae undergo clonal reproduction only occasionally  
509 punctuated by sex, are small enough that within-collective mutation probably has  
510 negligible phenotypic effects, and have cell numbers that are under tight genetic control.

## 511 **Conclusion**

512 A great deal of work has gone into understanding the selective pressures that may have  
513 driven major evolutionary transitions. However, heritability is just as important as the  
514 strength of selection in predicting evolutionary outcomes. We have shown that, given  
515 some simplifying assumptions, heritability of collective-level traits comes ‘for free’; that  
516 is, it emerges as an inevitable consequence of group formation. Qualitatively, this result  
517 holds across a wide range of parameters and for a diverse sample of biologically relevant  
518 traits. Collective-level heritability is maximized (relative to particle-level heritability)  
519 when phenotypic variation among particles is high and when environmental  
520 heterogeneity and variation in collective size are low. Understanding the emergence of  
521 trait heritability at higher levels is necessary to model any process involving multilevel  
522 selection, so our results are relevant to a variety of other problems.

## 523 **Declarations**

524 *Ethics approval and consent to participate*

525 Not applicable

526 *Consent for publication*

527 Not applicable

528 *Availability of data and material*

529 All data generated or analysed during this study are included in this published article [and  
530 its supplementary information files].

531 *Competing interests*

532 The authors declare that they have no competing interests

533 *Funding*

534 This work was supported by grants from NASA (NNA17BB05A, NNX15AR33G), NSF  
535 (DEB-1457701, DEB-1723293, DEB-1456652), and the John Templeton Foundation  
536 (43285).

537 *Authors' contributions*

538 MDH conceived the project, developed the analytical model, contributed to the  
539 simulation models, and contributed to writing the manuscript. SAZ-D and WCR  
540 developed the simulation models and contributed to writing the manuscript. All authors  
541 read and approved the final manuscript.

542 *Acknowledgements*

543 We would like to thank Sam Brown, Peter Conlin, Michael Doebeli, Rick Michod, and  
544 Deborah Shelton for helpful discussions.

545

546

547 **References**

- 548 1. Maynard Smith J, Szathmáry E. The Major Transitions in Evolution [Internet]. Oxford:  
549 Oxford University Press; 1995 [cited 2011 Jun 3]. Available from:  
550 [books.google.com/books?isbn=019850294X](http://books.google.com/books?isbn=019850294X)
- 551 2. Michod RE, Roze D. Transitions in individuality. *Proc Biol Sci* [Internet]. 1997 [cited  
552 2011 Mar 2];264:853–7. Available from: <http://www.jstor.org/stable/info/50748>
- 553 3. Ratcliff WC, Herron M, Conlin PL, Libby E. Nascent life cycles and the emergence of  
554 higher-level individuality. *Philos Trans R Soc B Biol Sci*. 2017;372:20160420.
- 555 4. Lewontin RC. The units of selection. *Annu Rev Ecol Syst* [Internet]. 1970 [cited 2011  
556 Jun 21];1:1–18. Available from:  
557 <http://www.annualreviews.org/doi/abs/10.1146/annurev.es.01.110170.000245>
- 558 5. Damuth J, Heisler IL. Alternative formulations of multilevel selection. *Biol Philos*  
559 [Internet]. Springer Netherlands; 1988 [cited 2011 Jul 4];3:407–30. Available  
560 from: <http://www.springerlink.com/content/h2102q8729931136/>
- 561 6. Michod RE. On the transfer of fitness from the cell to the multicellular organism. *Biol*  
562 *Philos* [Internet]. Springer Netherlands; 2005 [cited 2011 Mar 2];20:967–87.  
563 Available from: <http://www.springerlink.com/content/111hx10587083p24/>
- 564 7. Michod RE. Evolutionary transitions in individuality: multicellularity and sex. In:  
565 Calcott B, Sterelny K, editors. *Major Transitions Evol Revisit*. MIT Press; 2011.  
566 p. 167–97.
- 567 8. Simpson C. How many levels are there? How insights from evolutionary transitions in  
568 individuality help measure the hierarchical complexity of life. In: Calcott B,  
569 Sterelny K, editors. *Major Transitions Evol Revisit*. Cambridge: The MIT Press;  
570 2011. p. 199–225.
- 571 9. Okasha S. Multilevel selection and the major transitions in evolution. *Philos Sci*.  
572 2005;72:1013–25.
- 573 10. Godfrey-Smith P. *Darwinian Populations and Natural Selection*. Oxford: Oxford  
574 University Press; 2009.
- 575 11. Shelton DE, Michod RE. Philosophical foundations for the hierarchy of life. *Biol*  
576 *Philos* [Internet]. 2010 [cited 2011 Jan 5];25:391–403. Available from:  
577 <http://www.springerlink.com/content/d56j414582nr2172/>
- 578 12. Rainey PB, Kerr B. Conflicts among levels of selection as fuel for the evolution of  
579 individuality. In: Calcott B, Sterelny K, editors. *Major Transitions Evol Revisit*.  
580 Cambridge: The MIT Press; 2011. p. 141–62.
- 581 13. Bedau MA. Weak emergence. *Noûs* [Internet]. 1997;31:375–9. Available from:  
582 <http://onlinelibrary.wiley.com/doi/10.1111/0029-4624.31.s11.17/abstract>
- 583 14. Okasha S. *Evolution and the Levels of Selection*. Oxford: Oxford University Press;  
584 2006.
- 585 15. Goodnight CJ. Multilevel selection: the evolution of cooperation in non-kin groups.  
586 *Popul Ecol* [Internet]. Springer Japan; 2005 [cited 2011 May 3];47:3–12.  
587 Available from: <http://www.springerlink.com/content/j1362gv14401410x/>
- 588 16. Falconer DS. *Introduction to Quantitative Genetics*. New York: Ronald Press Co.;  
589 1960.

- 590 17. Lynch M, Walsh B. Genetics and Analysis of Quantitative Traits. Sunderland, MA:  
591 Sinauer Associates, Inc.; 1998.
- 592 18. Elowitz MB, Levine AJ, Siggia ED, Swain PS. Stochastic gene expression in a single  
593 cell. *Science* (80- ). 2002;297:1183–6.
- 594 19. McAdams HH, Arkin A. Stochastic mechanisms in gene expression. *Proc Natl Acad*  
595 *Sci USA*. 1997;94:814–9.
- 596 20. Blake WJ, Kærn M, Cantor CR, Collins JJ. Noise in eukaryotic gene expression.  
597 *Nature* [Internet]. 2003;422:633–7. Available from:  
598 <http://www.ncbi.nlm.nih.gov/pubmed/22839658>
- 599 21. Burton GW, DeVane EH. Estimating heritability in tall fescue (*Festuca*  
600 *Arundinaceae*) from replicated clonal material. *Agron J*. 1953;45:478–81.
- 601 22. Herron MD, Ghimire S, Vinikoor CR, Michod RE. Fitness trade-offs and  
602 developmental constraints in the evolution of soma: An experimental study in a  
603 volvocine alga. *Evol Ecol Res* [Internet]. 2014;16:203–21. Available from:  
604 <http://www.evolutionary-ecology.com/abstracts/v16/2917.html>
- 605 23. Palmer AR. Fluctuating asymmetry analyses: A primer. In: Markow TA, editor. *Dev*  
606 *Instab Its Orig Evol Implic* [Internet]. Dordrecht, Netherlands: Kluwer; 1994. p.  
607 335–64. Available from:  
608 <http://www.biology.ualberta.ca/palmer.hp/pubs/94Primer/Primer.pdf>
- 609 24. Stanley SM. An ecological theory for the sudden origin of multicellular life in the  
610 Late Precambrian. *Proc Natl Acad Sci USA* [Internet]. 1973;70:1486–9. Available  
611 from: <http://www.pnas.org/cgi/content/abstract/70/5/1486>
- 612 25. Bell G. The origin and early evolution of germ cells as illustrated by the Volvocales  
613 [Internet]. Halvorson HO, Monroy A, editors. *Orig. Evol. Sex*. New York: Alan  
614 R. Liss; 1985. Available from: [books.google.com/books?id=OcsdAQAIAAJ](https://books.google.com/books?id=OcsdAQAIAAJ)
- 615 26. Solari CA, Kessler JO, Michod RE. A hydrodynamics approach to the evolution of  
616 multicellularity: flagellar motility and germ-soma differentiation in volvocalean  
617 green algae. *Am Nat* [Internet]. The University of Chicago Press; 2006 [cited  
618 2011 Jun 7];167:537–54. Available from:  
619 <http://www.jstor.org/stable/info/10.1086/501031>
- 620 27. Bonner JT. Perspective: the size-complexity rule. *Evolution* (N Y). 2004;58:1883–90.
- 621 28. Peters RH. *The Ecological Implications of Body Size*. Cambridge: Cambridge  
622 University Press; 1983.
- 623 29. Kirk DL. *Volvox: Molecular-Genetic Origins of Multicellularity* [Internet].  
624 Cambridge: Cambridge University Press; 1998. Available from:  
625 [books.google.com/books?isbn=0521019141](https://books.google.com/books?isbn=0521019141)
- 626 30. Boraas ME, Seale DB, Boxhorn JE. Phagotrophy by a flagellate selects for colonial  
627 prey: a possible origin of multicellularity. *Evol Ecol*. 1998;12:153–64.
- 628 31. Herron MD, Borin JM, Boswell JC, Walker J, Chen I-CK, Knox CA, et al. De novo  
629 origins of multicellularity in response to predation. *bioRxiv*.  
630 2018;10.1101/247361.
- 631 32. Becks L, Ellner SP, Jones LE, Hairston NG. Reduction of adaptive genetic diversity  
632 radically alters eco-evolutionary community dynamics. *Ecol Lett* [Internet]. 2010

- 633 [cited 2013 Aug 6];13:989–97. Available from:  
634 <http://www.ncbi.nlm.nih.gov/pubmed/20528898>
- 635 33. Goodnight CJ. The influence of environmental variation on group and individual  
636 selection in a cress. *Evolution* (N Y) [Internet]. 1985;39:545–58. Available from:  
637 <http://links.isiglobalnet2.com/gateway/Gateway.cgi?GWVersion=2&SrcAuth=me>  
638 [kentosj&SrcApp=Papers&DestLinkType=FullRecord&DestApp=WOS&KeyUT](http://links.isiglobalnet2.com/gateway/Gateway.cgi?GWVersion=2&SrcAuth=me)  
639 [=A1985AJY2600006%5Cnpapers2://publication/uuid/FDE6CE8D-EA49-47C3-](http://links.isiglobalnet2.com/gateway/Gateway.cgi?GWVersion=2&SrcAuth=me)  
640 [9CC5-9956F9BDD9B8](http://links.isiglobalnet2.com/gateway/Gateway.cgi?GWVersion=2&SrcAuth=me)
- 641 34. Queller DC. Quantitative genetics, inclusive fitness, and group selection. *Am Nat*  
642 [Internet]. 1992 [cited 2011 Apr 14];139:540–58. Available from:  
643 <http://www.jstor.org/stable/info/2462497>
- 644 35. Okasha S. The concept of group heritability. *Biol Philos* [Internet]. 2003 [cited 2011  
645 Mar 28];18:445–61. Available from:  
646 <http://www.springerlink.com/content/rtx271pm8877276p/>
- 647 36. Michod RE. Evolution of the individual. *Am Nat* [Internet]. 1997 [cited 2011 Mar  
648 2];150 Suppl:S5–21. Available from:  
649 <http://www.jstor.org/stable/info/10.1086/286047>
- 650 37. Buss LW. The uniqueness of the individual revisited. *Popul Biol Evol Clonal Org.*  
651 1986. p. 467–505.
- 652 38. Buss LW. *The Evolution of Individuality* [Internet]. Princeton: Princeton University  
653 Press; 1987. Available from: [books.google.com/books?isbn=0691084696](http://books.google.com/books?isbn=0691084696)
- 654 39. Slatkin M. Populational heritability. *Evolution* (N Y) [Internet]. 1981 [cited 2011  
655 May 3];35:859–71. Available from: <http://www.jstor.org/stable/info/2407856>
- 656 40. Wade MJ, McCauley DE. Group selection: the phenotypic and genotypic  
657 differentiation of small populations. *Evolution* (N Y) [Internet]. 1980 [cited 2011  
658 May 3];34:799–812. Available from: <http://www.jstor.org/stable/info/2408034>
- 659 41. Bijma P, Muir WM, Ellen ED, Wolf JB, Van Arendonk JAM. Multilevel selection 2:  
660 Estimating the genetic parameters determining inheritance and response to  
661 selection. *Genetics*. 2007;175:289–99.
- 662 42. Bijma P, Muir WM, Van Arendonk JAM. Multilevel selection 1: Quantitative  
663 genetics of inheritance and response to selection. *Genetics*. 2007;175:277–88.
- 664 43. Wade MJ, Bijma P, Ellen ED, Muir W. Group selection and social evolution in  
665 domesticated animals. *Evol Appl*. 2010;3:453–65.
- 666 44. Queller DC. Cooperators since life began. *Q Rev Biol* [Internet]. 1997;72:184–8.  
667 Available from: <http://www.jstor.org/stable/3036338>
- 668 45. Sathe S, Kaushik S, Lalremruata A, Aggarwal RK, Cavender JC, Nanjundiah V.  
669 Genetic heterogeneity in wild isolates of cellular slime mold social groups.  
670 *Microb Ecol*. 2010;60:137–48.
- 671 46. Gilbert OM, Foster KR, Mehdiabadi NJ, Strassmann JE, Queller DC. High  
672 relatedness maintains multicellular cooperation in a social amoeba by controlling  
673 cheater mutants. *Proc Natl Acad Sci USA* [Internet]. 2007;104:8913–7. Available  
674 from:  
675 <http://www.pubmedcentral.nih.gov/articlerender.fcgi?artid=1885602&tool=pmce>

- 676           ntrez&rendertype=abstract  
677   47. Gilbert OM, Queller DC, Strassmann JE. Discovery of a large clonal patch of a social  
678       amoeba: Implications for social evolution. *Mol Ecol.* 2009;18:1273–81.  
679   48. Parfrey LW, Lahr DJG. Multicellularity arose several times in the evolution of  
680       eukaryotes. *BioEssays.* 2013;35:339–47.  
681   49. Niklas KJ, Newman SA. The origins of multicellular organisms. *Evol Dev [Internet].*  
682       2013 [cited 2013 May 24];15:41–52. Available from:  
683       <http://www.ncbi.nlm.nih.gov/pubmed/23331916>  
684   50. Herron MD, Rashidi A, Shelton DE, Driscoll WW. Cellular differentiation and  
685       individuality in the “minor” multicellular taxa. *Biol Rev.* 2013;88:844–61.  
686   51. Melkonian M. Phylum Chlorophyta. In: Margulis L, Corliss JO, Melkonian M,  
687       Chapman DJ, editors. *Handb Protocista.* Boston: Jones and Bartlett Publishers;  
688       1990. p. 597–660.  
689

# 1. Cellular reproduction

Cell size drawn from distribution centered around genetic mean

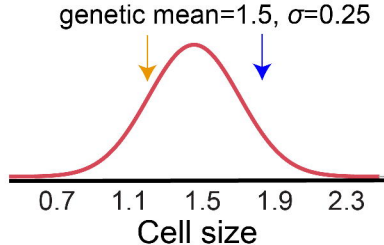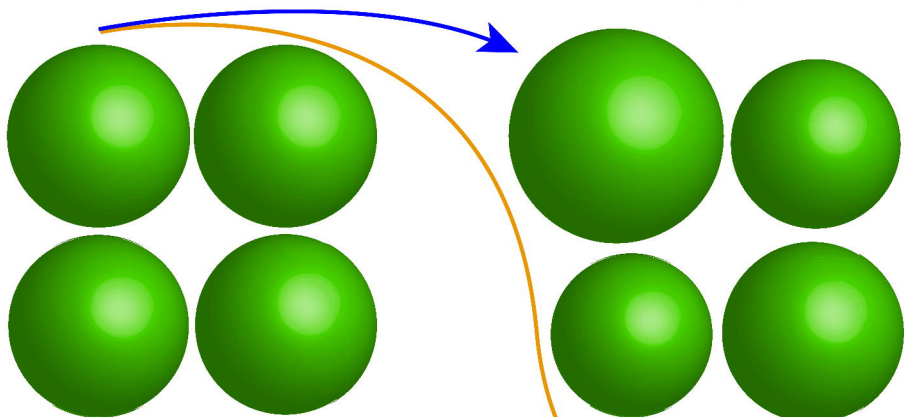

# 2. Environmental effects

All cells in collective are larger or smaller

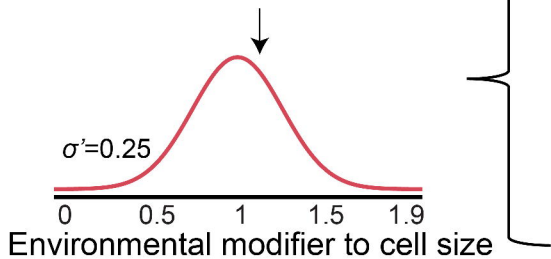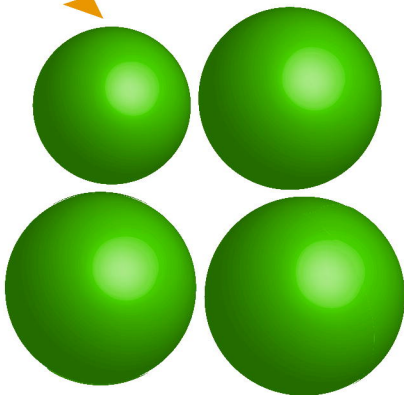

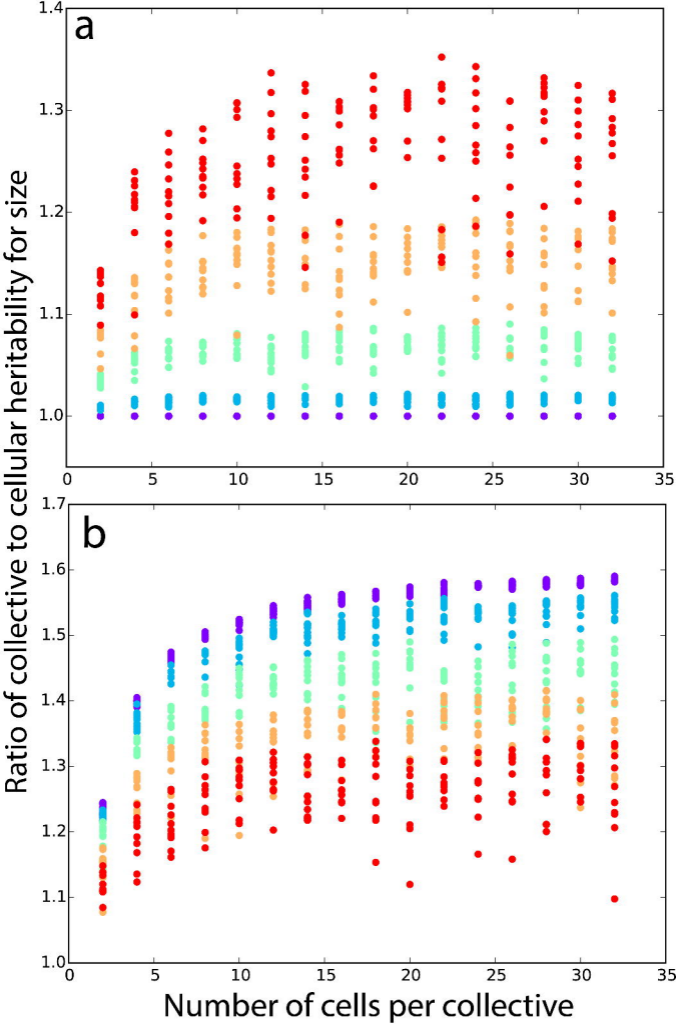



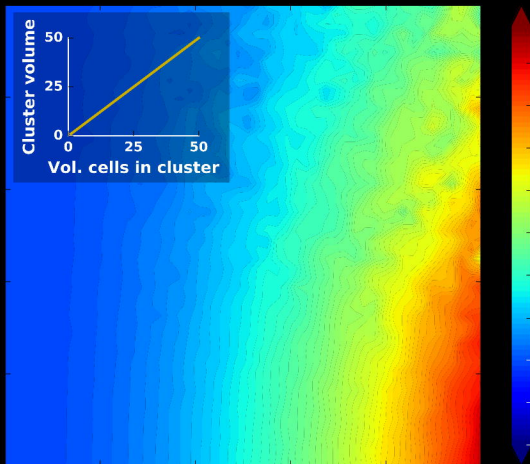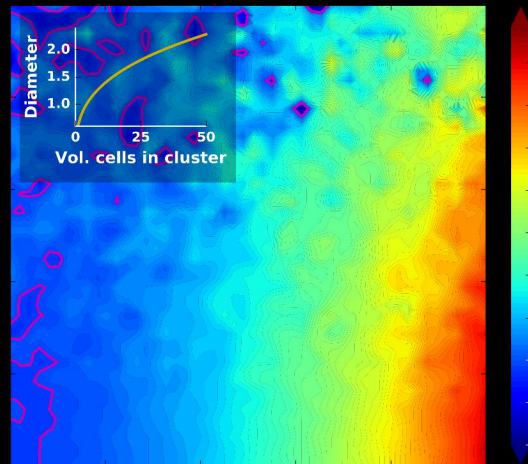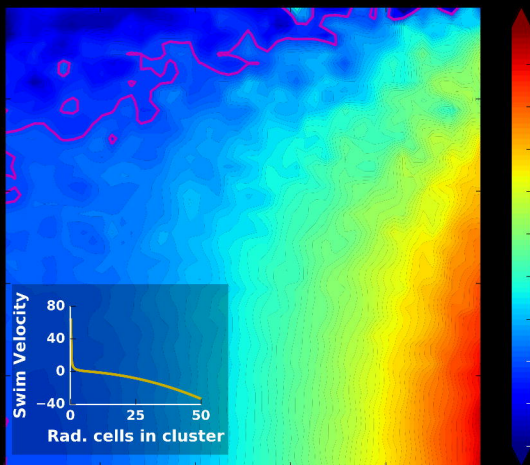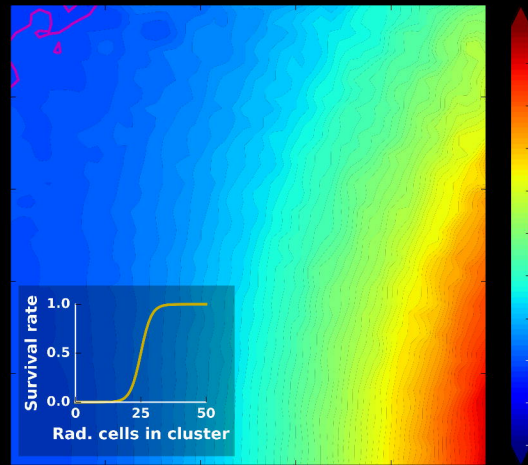

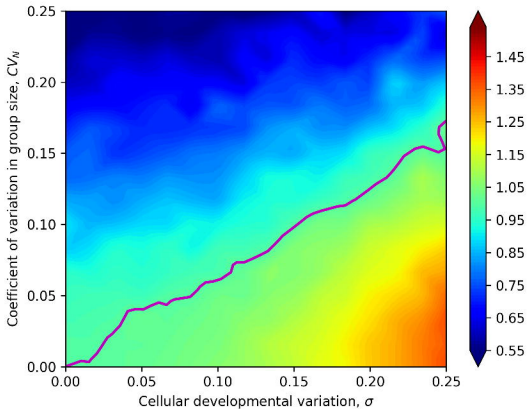

Source: http://biorxiv.org/content/10.1101/041830v4.full.pdf
